# Supplementary material for: BCOR::CREBBP fusion in malignant neuroepithelial tumor of CNS expands the spectrum of methylation class CNS tumor with BCOR/BCOR(L1)-fusion
Source: Springer Nature journal article supplement (doi:10.1186/s40478-024-01780-5), 2024-04-18
Supplement: MOESM1 [file 26995022]

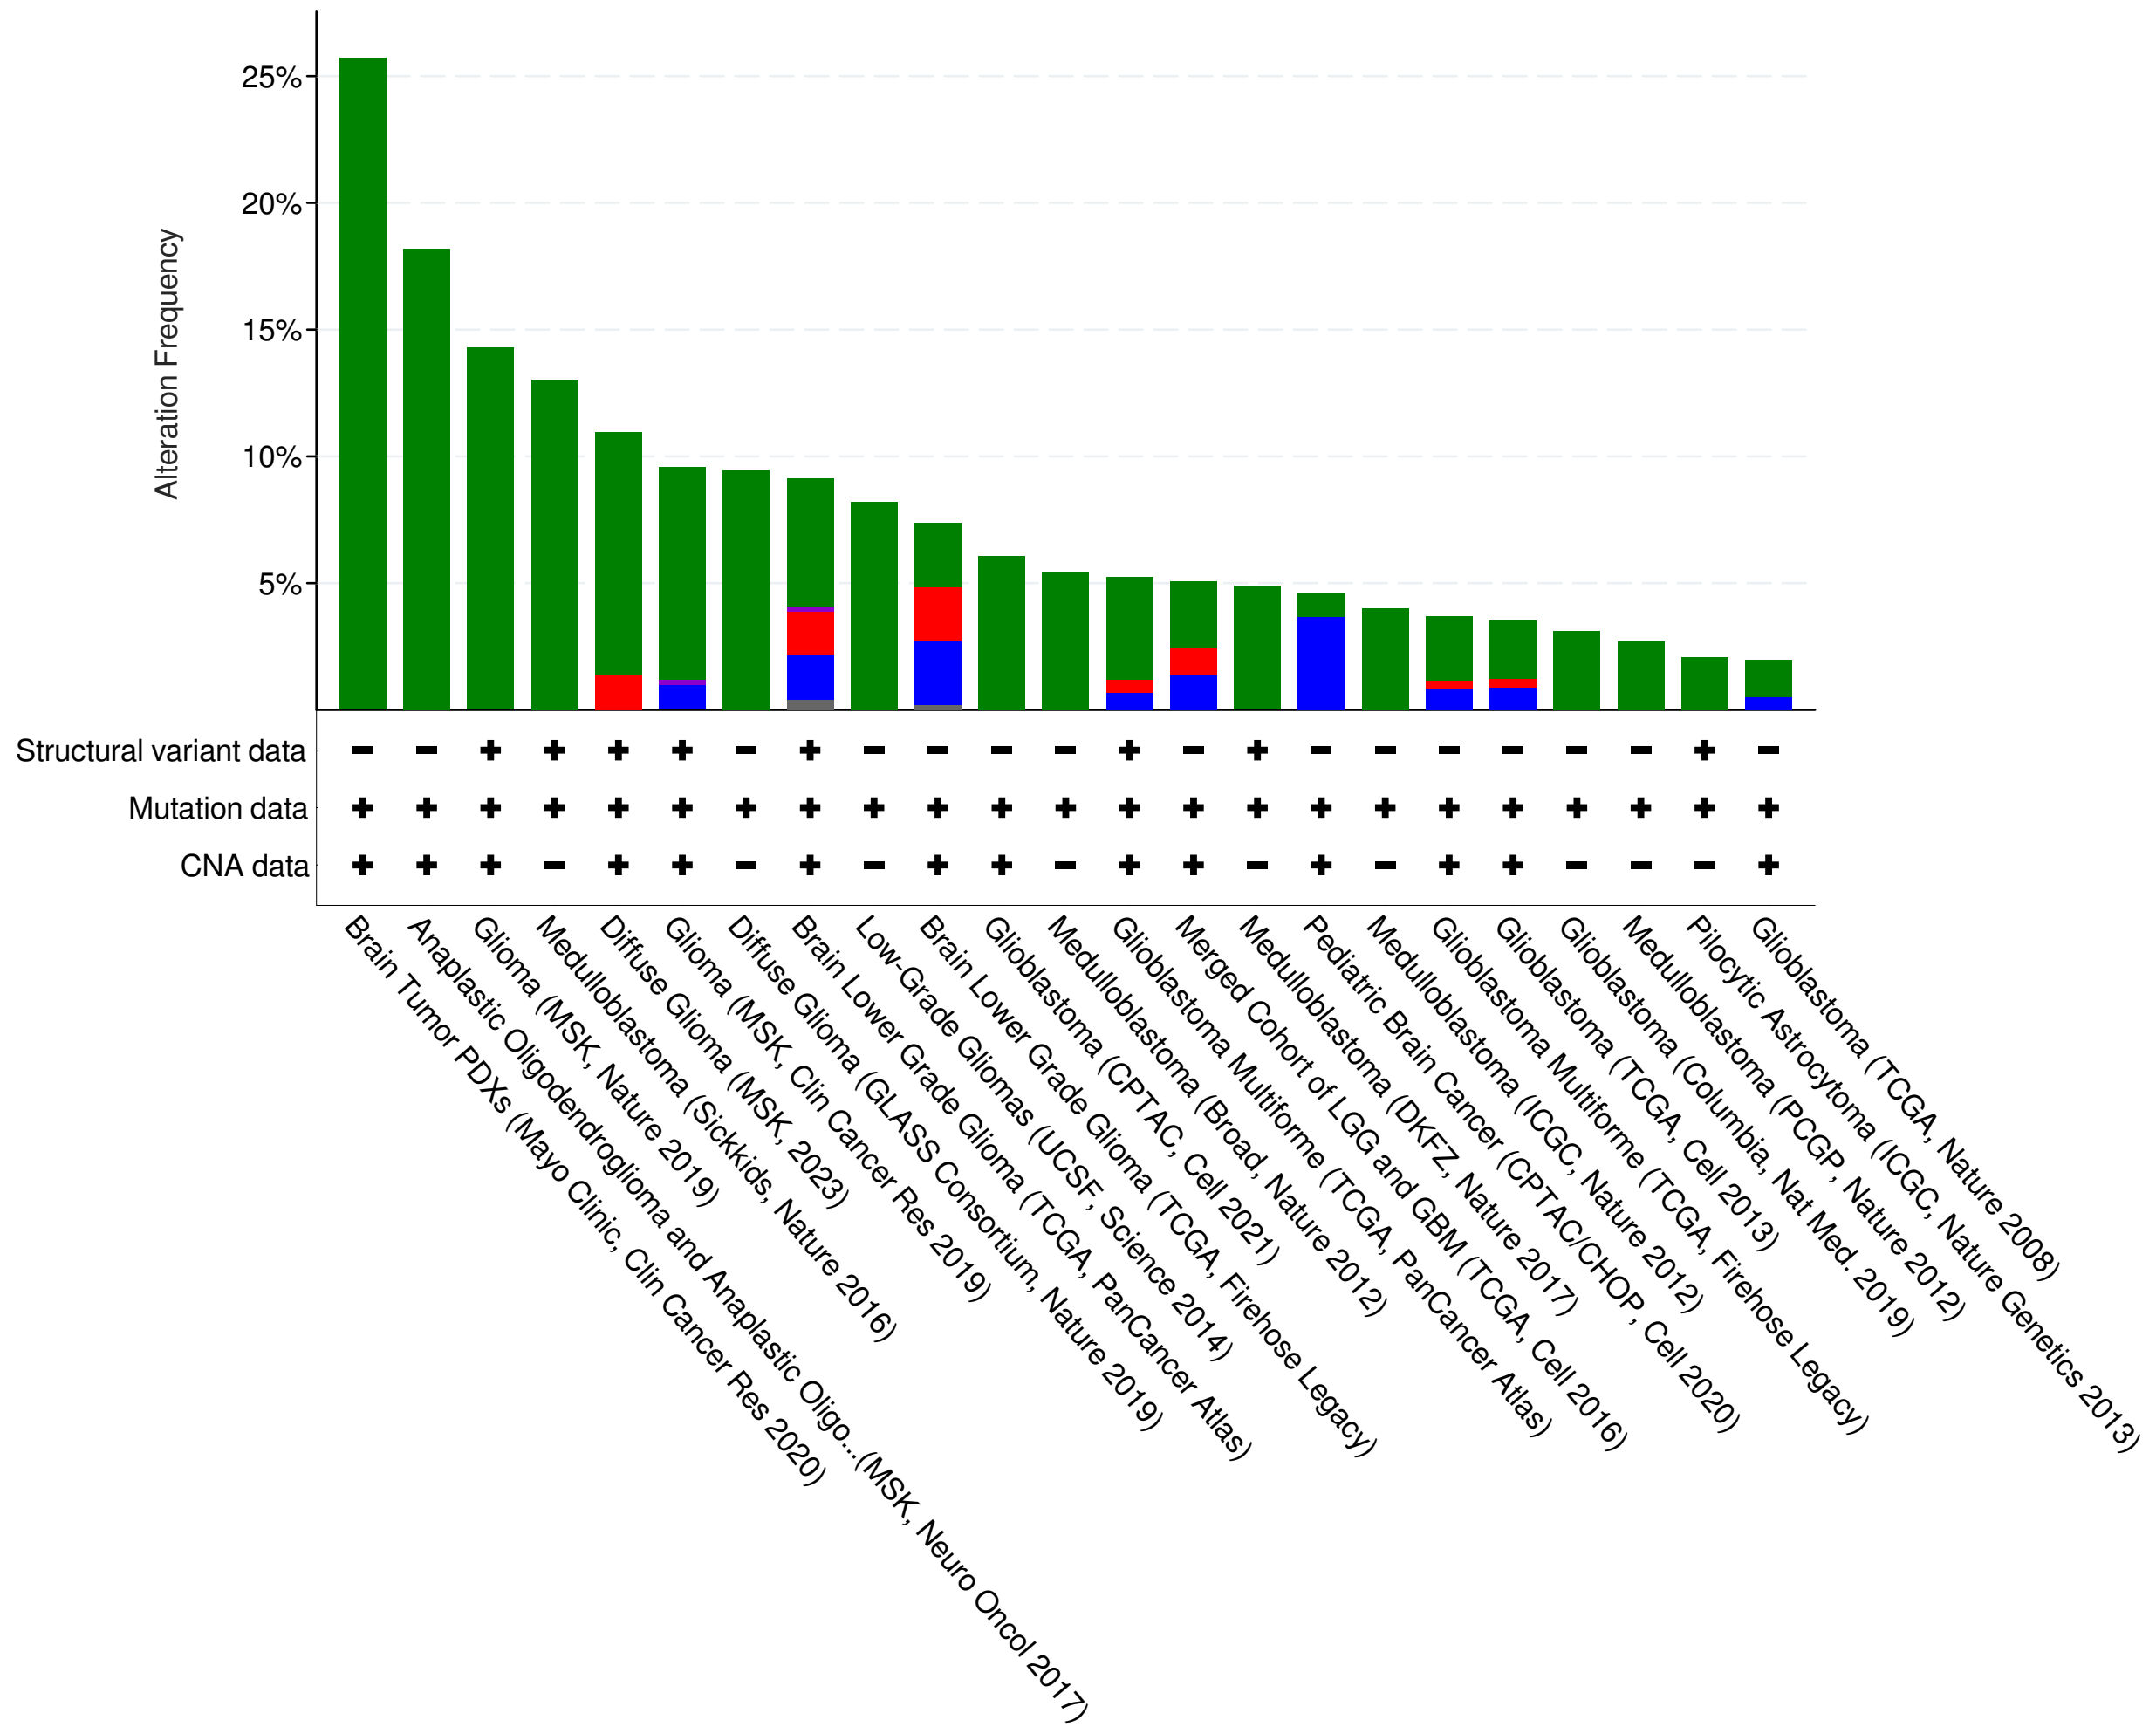

● Mutation
 ● Structural Variant
 ● Amplification
 ● Deep Deletion
 ● Multiple Alterations
